# Supplementary material for: Association between the dead space fraction and mortality in critically ill patients with acute respiratory failure: an analysis of the MIMIC-IV database
Source: Research Square preprint supplement (doi:10.21203/rs.3.rs-7972231/v1), 2025-12-15
Supplement: Supplementary file 1 [file 8c2ccdfadf35791c434515f6.docx]

Table1.Summary of patient characteristics.

| Variables | Total (n = 2254) | ICU dead (n = 1709) | Survival (n = 545) | P |
| --- | --- | --- | --- | --- |
| Age, M (Q₁, Q₃) | 63.00 (52.00, 71.00) | 63.00 (52.00, 71.00) | 64.00 (54.00, 71.00) | 0.132 |
| **Gender, n (%)** |  |  |  | 0.554 |
| Men | 1389 (61.62) | 1059 (61.97) | 330 (60.55) |  |
| Female | 865 (38.38) | 650 (38.03) | 215 (39.45) |  |
| **Vital signs** |  |  |  |  |
| MAP, mmHg, M (Q₁, Q₃) | 79.00 (71.00, 84.00) | 79.00 (72.00, 83.00) | 79.00 (66.00, 87.00) | 0.096 |
| RR, bpm, M (Q₁, Q₃) | 20.00 (16.00, 24.00) | 19.00 (16.00, 24.00) | 21.00 (18.00, 26.00) | <.001 |
| SPO2, %, M (Q₁, Q₃) | 98.00 (95.00, 100.00) | 98.00 (95.00, 100.00) | 97.00 (93.00, 100.00) | <.001 |
| **Arterial blood gas** |  |  |  |  |
| PH, M (Q₁, Q₃) | 7.32 (7.25, 7.39) | 7.34 (7.26, 7.39) | 7.28 (7.19, 7.36) | <.001 |
| PaCO2, mmHg, M (Q₁, Q₃) | 45.00 (39.00, 53.00) | 45.00 (39.00, 52.00) | 45.00 (38.00, 55.00) | 0.563 |
| PaO2, mmHg, M (Q₁, Q₃) | 88.00 (51.00, 160.75) | 91.00 (53.00, 173.00) | 79.00 (48.00, 132.00) | <.001 |
| Lactate, mmol/L, M (Q₁, Q₃) | 2.00 (1.30, 3.20) | 1.80 (1.20, 2.90) | 2.90 (1.60, 5.80) | <.001 |
| **Laboratory parameters** |  |  |  |  |
| WBC, x10⁹/L, M (Q₁, Q₃) | 13.20 (9.33, 18.00) | 12.80 (9.10, 17.30) | 14.40 (9.80, 20.20) | <.001 |
| Platelets, x10⁹/L, M (Q₁, Q₃) | 204.00 (146.25, 266.00) | 203.00 (147.00, 264.00) | 205.00 (143.00, 273.00) | 0.951 |
| Albumin, g/dL, M (Q₁, Q₃) | 2.94 (2.70, 3.20) | 2.94 (2.70, 3.20) | 2.94 (2.50, 3.10) | <.001 |
| Glucose, mg/dL, M (Q₁, Q₃) | 141.00 (114.00, 187.00) | 136.00 (113.00, 176.00) | 160.00 (119.00, 220.00) | <.001 |
| ALT, IU/L, M (Q₁, Q₃) | 44.00 (20.00, 203.00) | 40.00 (19.00, 201.00) | 72.00 (25.00, 203.00) | <.001 |
| AST, IU/L, M (Q₁, Q₃) | 61.00 (29.00, 290.00) | 53.00 (27.00, 233.00) | 103.00 (38.00, 320.00) | <.001 |
| Creatinine, mg/dL, M (Q₁, Q₃) | 1.10 (0.80, 1.70) | 1.00 (0.70, 1.50) | 1.40 (1.00, 2.40) | <.001 |
| **Scoring systems** |  |  |  |  |
| SOFA, M (Q₁, Q₃) | 7.00 (4.00, 10.00) | 6.00 (4.00, 9.00) | 9.00 (7.00, 12.00) | <.001 |
| APACHE III, M (Q₁, Q₃) | 49.00 (36.00, 68.00) | 45.00 (34.00, 60.00) | 67.00 (50.00, 91.00) | <.001 |
| SAPS II, M (Q₁, Q₃) | 40.00 (31.00, 52.00) | 38.00 (30.00, 47.00) | 50.00 (38.00, 61.00) | <.001 |
| **Comorbidity (n,%)** |  |  |  |  |
| Hypertension | 825 (36.60) | 648 (37.92) | 177 (32.48) | 0.022 |
| Diabetes Mellitus | 693 (30.75) | 534 (31.25) | 159 (29.17) | 0.361 |
| Heart Failure | 568 (25.20) | 421 (24.63) | 147 (26.97) | 0.274 |
| Myocardial Infarction | 313 (13.89) | 216 (12.64) | 97 (17.80) | 0.002 |
| Malignant Tumor | 224 (9.94) | 158 (9.25) | 66 (12.11) | 0.052 |
| CKD | 377 (16.73) | 266 (15.56) | 111 (20.37) | 0.009 |
| AKI | 2033 (90.20) | 1520 (88.94) | 513 (94.13) | <.001 |
| Pneumonia | 995 (44.14) | 765 (44.76) | 230 (42.20) | 0.294 |
| Stroke | 95 (4.21) | 70 (4.10) | 25 (4.59) | 0.619 |
| COPD | 375 (16.64) | 271 (15.86) | 104 (19.08) | 0.078 |
| Ventilation | 2133 (94.63) | 1652 (96.66) | 481 (88.26) | <.001 |
| PETCO2, M (Q₁, Q₃) | 34.00 (30.00, 39.00) | 35.00 (31.00, 40.00) | 31.00 (26.00, 37.00) | <.001 |
| VD/VT, M (Q₁, Q₃) | 0.22 (0.11, 0.35) | 0.20 (0.10, 0.32) | 0.31 (0.18, 0.43) | <.001 |
| Hospital day, M (Q₁, Q₃) | 13.08 (6.63, 24.28) | 16.20 (9.09, 28.29) | 5.14 (2.14, 11.62) | <.001 |
| ICU stay day, M (Q₁, Q₃) | 6.26 (2.99, 12.61) | 6.76 (3.25, 13.36) | 4.93 (2.32, 10.01) | <.001 |
| Data presented as median (IQR) for continuous variables and n (%) for categorical variables. M: Median, Q₁: 1st Quartile, Q₃: 3st Quartile; MAP, mean artery pressure; RR, respiratory rate; WBC, white blood cell; ALT, alanine aminotransferase; AST, aspartate aminotransferase; CKD, chronic kidney disease; AKI, acute kidney injury; COPD, chronic obstructive pulmonary disease; PETCO2, end-tidal carbon dioxide pressure; VD/VT, dead space fraction. | | | | |

Table2. Logistic Regression Analysis of the Association Between Variables and ICU Mortality.

| Variables | Univariable | | | | |  | multivariable | | | | |
| --- | --- | --- | --- | --- | --- | --- | --- | --- | --- | --- | --- |
| β | S.E | Z | *P* | OR (95%CI) | β | S.E | Z | *P* | OR (95%CI) |
| Age | 0.01 | 0.00 | 1.77 | 0.077 | 1.01 (1.00 ~ 1.01) |  | 0.01 | 0.00 | 1.42 | 0.155 | 1.01 (1.00 ~ 1.02) |
| **Gender** |  |  |  |  |  |  |  |  |  |  |  |
| Men |  |  |  |  | 1.00 (Reference) |  |  |  |  |  | 1.00 (Reference) |
| Female | 0.06 | 0.10 | 0.59 | 0.554 | 1.06 (0.87 ~ 1.29) |  | 0.02 | 0.11 | 0.20 | 0.842 | 1.02 (0.82 ~ 1.27) |
| **Vital signs** |  |  |  |  |  |  |  |  |  |  |  |
| MAP | -0.00 | 0.00 | -0.17 | 0.867 | 1.00 (1.00 ~ 1.00) |  | 0.00 | 0.00 | 1.04 | 0.298 | 1.00 (1.00 ~ 1.00) |
| RR | 0.05 | 0.01 | 6.07 | <.001 | 1.05 (1.03 ~ 1.06) |  | 0.03 | 0.01 | 2.99 | 0.003 | 1.03 (1.01 ~ 1.04) |
| SPO2 | -0.04 | 0.01 | -4.63 | <.001 | 0.96 (0.94 ~ 0.98) |  | -0.02 | 0.01 | -2.52 | 0.012 | 0.98 (0.96 ~ 0.99) |
| **Laboratory parameters** |  |  |  |  |  |  |  |  |  |  |  |
| WBC | 0.02 | 0.01 | 3.94 | <.001 | 1.02 (1.01 ~ 1.03) |  | 0.01 | 0.01 | 1.49 | 0.137 | 1.01 (1.00 ~ 1.02) |
| Platelet | -0.00 | 0.00 | -0.20 | 0.841 | 1.00 (1.00 ~ 1.00) |  | -0.00 | 0.00 | -0.71 | 0.480 | 1.00 (1.00 ~ 1.00) |
| Albumin | -0.37 | 0.09 | -4.07 | <.001 | 0.69 (0.58 ~ 0.82) |  | -0.22 | 0.10 | -2.21 | 0.027 | 0.80 (0.66 ~ 0.98) |
| Glucose | 0.01 | 0.00 | 6.25 | <.001 | 1.01 (1.01 ~ 1.01) |  | 0.01 | 0.00 | 2.85 | 0.004 | 1.01 (1.01 ~ 1.01) |
| ALT | 0.01 | 0.00 | 5.33 | <.001 | 1.01 (1.01 ~ 1.01) |  | 0.00 | 0.00 | 1.02 | 0.307 | 1.00 (1.00 ~ 1.00) |
| AST | 0.01 | 0.00 | 6.18 | <.001 | 1.01 (1.01 ~ 1.01) |  | -0.00 | 0.00 | -0.06 | 0.952 | 1.00 (1.00 ~ 1.00) |
| Creatinine | 0.17 | 0.03 | 6.37 | <.001 | 1.19 (1.13 ~ 1.26) |  | 0.09 | 0.03 | 2.99 | 0.003 | 1.10 (1.03 ~ 1.16) |
| **Arterial blood gas** |  |  |  |  |  |  |  |  |  |  |  |
| PH | -4.50 | 0.44 | -10.21 | <.001 | 0.01 (0.00 ~ 0.03) |  | -0.11 | 0.70 | -0.16 | 0.873 | 0.89 (0.23 ~ 3.52) |
| PCO2 | 0.01 | 0.00 | 1.49 | 0.137 | 1.01 (1.00 ~ 1.01) |  | -0.02 | 0.01 | -3.14 | 0.002 | 0.98 (0.97 ~ 0.99) |
| PaO2 | -0.01 | 0.00 | -4.36 | <.001 | 0.99 (0.99 ~ 0.99) |  | -0.01 | 0.00 | -2.75 | 0.006 | 0.99 (0.99 ~ 0.99) |
| Lactate | 0.21 | 0.02 | 11.50 | <.001 | 1.23 (1.19 ~ 1.27) |  | 0.13 | 0.02 | 5.28 | <.001 | 1.14 (1.08 ~ 1.19) |
| **Comorbidity** |  |  |  |  |  |  |  |  |  |  |  |
| Hypertension | -0.24 | 0.10 | -2.29 | 0.022 | 0.79 (0.64 ~ 0.97) |  | -0.16 | 0.13 | -1.24 | 0.215 | 0.85 (0.66 ~ 1.10) |
| Diabetes Mellitus | -0.10 | 0.11 | -0.91 | 0.361 | 0.91 (0.73 ~ 1.12) |  | -0.29 | 0.14 | -2.14 | 0.033 | 0.75 (0.57 ~ 0.98) |
| Heart Failure | 0.12 | 0.11 | 1.09 | 0.274 | 1.13 (0.91 ~ 1.41) |  | -0.08 | 0.14 | -0.58 | 0.563 | 0.92 (0.70 ~ 1.22) |
| Myocardial Infarction | 0.40 | 0.13 | 3.02 | 0.003 | 1.50 (1.15 ~ 1.94) |  | 0.13 | 0.16 | 0.85 | 0.398 | 1.14 (0.84 ~ 1.55) |
| Malignant Tumor | 0.30 | 0.16 | 1.94 | 0.052 | 1.35 (1.00 ~ 1.83) |  | 0.24 | 0.17 | 1.40 | 0.162 | 1.28 (0.91 ~ 1.80) |
| CKD | 0.33 | 0.13 | 2.61 | 0.009 | 1.39 (1.08 ~ 1.77) |  | 0.18 | 0.17 | 1.11 | 0.267 | 1.20 (0.87 ~ 1.67) |
| AKI | 0.69 | 0.20 | 3.49 | <.001 | 1.99 (1.35 ~ 2.94) |  | 0.53 | 0.21 | 2.49 | 0.013 | 1.70 (1.12 ~ 2.59) |
| Pneumonia | -0.10 | 0.10 | -1.05 | 0.295 | 0.90 (0.74 ~ 1.09) |  | -0.10 | 0.11 | -0.89 | 0.373 | 0.91 (0.73 ~ 1.13) |
| Stroke | 0.12 | 0.24 | 0.50 | 0.619 | 1.13 (0.71 ~ 1.80) |  | 0.22 | 0.26 | 0.83 | 0.404 | 1.24 (0.75 ~ 2.07) |
| COPD | 0.22 | 0.13 | 1.76 | 0.079 | 1.25 (0.97 ~ 1.61) |  | 0.17 | 0.15 | 1.16 | 0.244 | 1.19 (0.89 ~ 1.58) |
| **VD/VT** | 3.17 | 0.30 | 10.40 | <.001 | 23.78 (13.09 ~ 43.20) |  | 2.83 | 0.42 | 6.69 | <.001 | 16.90 (7.38 ~ 38.69) |
| WBC, white blood cell; ALT, alanine aminotransferase; AST, aspartate aminotransferase; CKD, chronic kidney disease; VD/VT, dead space fraction; β, regression coefficient; S.E, standard error; Z, Z-statistic; OR, odds ratio; CI, confidence interval. | | | | | | | | | | | |

Table3. COX Proportional Hazards Regression Analysis of the Association Between Variables and ICU Mortality

| Variables | Univariable | | | | |  | multivariable | | | | |
| --- | --- | --- | --- | --- | --- | --- | --- | --- | --- | --- | --- |
| β | S.E | Z | *P* | HR (95%CI) | β | S.E | Z | *P* | HR (95%CI) |
| Age | 0.01 | 0.00 | 2.26 | 0.024 | 1.01 (1.01 ~ 1.01) |  | 0.01 | 0.00 | 2.91 | 0.004 | 1.01 (1.01 ~ 1.02) |
| **Gender** |  |  |  |  |  |  |  |  |  |  |  |
| Men |  |  |  |  | 1.00 (Reference) |  |  |  |  |  | 1.00 (Reference) |
| Female | 0.12 | 0.09 | 1.33 | 0.184 | 1.12 (0.95 ~ 1.33) |  | 0.09 | 0.09 | 1.04 | 0.297 | 1.10 (0.92 ~ 1.31) |
| **Arterial blood gas** |  |  |  |  |  |  |  |  |  |  |  |
| PH | -3.77 | 0.31 | -12.19 | <.001 | 0.02 (0.01 ~ 0.04) |  | -0.58 | 0.51 | -1.14 | 0.254 | 0.56 (0.20 ~ 1.52) |
| PaCO2 | -0.00 | 0.00 | -0.03 | 0.979 | 1.00 (0.99 ~ 1.01) |  | -0.02 | 0.00 | -3.95 | <.001 | 0.98 (0.97 ~ 0.99) |
| PaO2 | -0.01 | 0.00 | -2.29 | 0.022 | 0.99 (0.99 ~ 0.99) |  | -0.01 | 0.00 | -2.00 | 0.045 | 0.99 (0.99 ~ 0.99) |
| Lactate | 0.17 | 0.01 | 19.43 | <.001 | 1.19 (1.17 ~ 1.21) |  | 0.12 | 0.01 | 8.52 | <.001 | 1.13 (1.10 ~ 1.16) |
| **Laboratory parameters** |  |  |  |  |  |  |  |  |  |  |  |
| WBC | 0.01 | 0.00 | 5.77 | <.001 | 1.01 (1.01 ~ 1.01) |  | 0.01 | 0.00 | 3.54 | <.001 | 1.01 (1.01 ~ 1.01) |
| Platelets | -0.00 | 0.00 | -1.51 | 0.131 | 1.00 (1.00 ~ 1.00) |  | -0.00 | 0.00 | -1.55 | 0.121 | 1.00 (1.00 ~ 1.00) |
| Albumin | -0.20 | 0.08 | -2.66 | 0.008 | 0.82 (0.71 ~ 0.95) |  | 0.00 | 0.07 | 0.01 | 0.990 | 1.00 (0.87 ~ 1.16) |
| Glucose | 0.01 | 0.00 | 6.55 | <.001 | 1.01 (1.01 ~ 1.01) |  | 0.01 | 0.00 | 2.74 | 0.006 | 1.01 (1.01 ~ 1.01) |
| ALT | 0.01 | 0.00 | 7.15 | <.001 | 1.01 (1.01 ~ 1.01) |  | 0.00 | 0.00 | 0.47 | 0.637 | 1.00 (1.00 ~ 1.00) |
| AST | 0.01 | 0.00 | 8.58 | <.001 | 1.01 (1.01 ~ 1.01) |  | 0.00 | 0.00 | 1.36 | 0.174 | 1.00 (1.00 ~ 1.00) |
| Creatinine | 0.12 | 0.02 | 7.72 | <.001 | 1.12 (1.09 ~ 1.16) |  | 0.08 | 0.02 | 3.44 | <.001 | 1.08 (1.03 ~ 1.13) |
| **Comorbidity** |  |  |  |  |  |  |  |  |  |  |  |
| Hypertension | -0.22 | 0.09 | -2.41 | 0.016 | 0.80 (0.67 ~ 0.96) |  | -0.09 | 0.11 | -0.79 | 0.430 | 0.92 (0.74 ~ 1.14) |
| Diabetes Mellitus | -0.13 | 0.09 | -1.39 | 0.163 | 0.88 (0.73 ~ 1.05) |  | -0.26 | 0.11 | -2.37 | 0.018 | 0.77 (0.62 ~ 0.96) |
| Heart Failure | 0.14 | 0.10 | 1.40 | 0.160 | 1.15 (0.95 ~ 1.38) |  | -0.09 | 0.12 | -0.82 | 0.413 | 0.91 (0.73 ~ 1.14) |
| Myocardial Infarction | 0.42 | 0.11 | 3.74 | <.001 | 1.52 (1.22 ~ 1.90) |  | 0.13 | 0.12 | 1.10 | 0.272 | 1.14 (0.90 ~ 1.45) |
| Malignant Tumor | 0.51 | 0.13 | 3.88 | <.001 | 1.67 (1.29 ~ 2.16) |  | 0.56 | 0.14 | 3.99 | <.001 | 1.75 (1.33 ~ 2.30) |
| CKD | 0.22 | 0.11 | 2.04 | 0.041 | 1.24 (1.01 ~ 1.53) |  | -0.01 | 0.14 | -0.08 | 0.939 | 0.99 (0.75 ~ 1.30) |
| AKI | -0.46 | 0.18 | -2.49 | 0.013 | 0.63 (0.44 ~ 0.91) |  | -0.80 | 0.19 | -4.21 | <.001 | 0.45 (0.31 ~ 0.65) |
| Pneumonia | -0.41 | 0.09 | -4.69 | <.001 | 0.66 (0.56 ~ 0.79) |  | -0.36 | 0.09 | -3.94 | <.001 | 0.70 (0.59 ~ 0.84) |
| Stroke | 0.09 | 0.20 | 0.46 | 0.645 | 1.10 (0.74 ~ 1.64) |  | 0.16 | 0.21 | 0.75 | 0.454 | 1.17 (0.78 ~ 1.76) |
| COPD | 0.15 | 0.11 | 1.35 | 0.177 | 1.16 (0.94 ~ 1.43) |  | 0.12 | 0.12 | 1.07 | 0.287 | 1.13 (0.90 ~ 1.42) |
| **VD/VT** | 2.56 | 0.25 | 10.22 | <.001 | 12.96 (7.93 ~ 21.17) |  | 2.26 | 0.34 | 6.69 | <.001 | 9.60 (4.95 ~ 18.61) |
| WBC, white blood cell; ALT, alanine aminotransferase; AST, aspartate aminotransferase; CKD, chronic kidney disease; COPD, chronic obstructive pulmonary disease; VD/VT, dead space fraction; β, regression coefficient; S.E, standard error; Z, Z-statistic; HR, hazard ratio; CI, confidence interval. | | | | | | | | | | | |

Table 4. Demographic and Clinical Characteristics of Patients Stratified by Quartiles of VD/VT

| Variables | Total (n = 2254) | Group 1 (n = 563) | Group 2 (n = 551) | Group 3 (n = 576) | Group 4 (n = 564) | *P* |
| --- | --- | --- | --- | --- | --- | --- |
|
| Age, M (Q₁, Q₃) | 63.00 (52.00, 71.00) | 62.00 (50.00,71.00) | 62.00 (52.00,71.00) | 63.00 (54.00,71.00) | 64.00 (52.00,71.00) | 0.269 |
| **Gender, n (%)** |  |  |  |  |  | 0.657 |
| Men | 1389 (61.62) | 351 (62.34) | 337 (61.16) | 364 (63.19) | 337 (59.75) |  |
| Female | 865 (38.38) | 212 (37.66) | 214 (38.84) | 212 (36.81) | 227 (40.25) |  |
| **Vital signs** |  |  |  |  |  |  |
| MAP, mmHg, M (Q₁, Q₃) | 79.00 (71.00, 84.00) | 79.00 (74.00,85.50) | 79.00 (72.00,85.00) | 79.00 (71.00,84.00) | 79.00 (68.00,81.00) | 0.008 |
| RR, bpm, M (Q₁, Q₃) | 20.00 (16.00, 24.00) | 18.00 (16.00,22.00) | 20.00 (16.00,24.00) | 20.00 (16.00,24.00) | 21.00 (17.00,26.00) | <.001 |
| SPO2, %, M (Q₁, Q₃) | 98.00 (95.00, 100.00) | 98.00 (96.00,100.00) | 98.00 (95.00,100.00) | 98.00 (95.00,100.00) | 97.00 (94.00,100.00) | <.001 |
| **Arterial blood gas** |  |  |  |  |  |  |
| PH, M (Q₁, Q₃) | 7.32 (7.25, 7.39) | 7.38 (7.32,7.42) | 7.35 (7.29,7.40) | 7.31 (7.24,7.36) | 7.24 (7.17,7.30) | <.001 |
| PaCO2, mmHg, M (Q₁, Q₃) | 45.00 (39.00, 53.00) | 40.00 (35.00,45.00) | 43.00 (38.00,49.00) | 47.00 (41.00,53.00) | 55.00 (46.75,66.00) | <.001 |
| PaO2, mmHg, M (Q₁, Q₃) | 88.00 (51.00, 160.75) | 110.00 (69.50,206.50) | 95.00 (58.00,172.00) | 84.00 (49.00,142.25) | 63.50 (42.00,113.25) | <.001 |
| Lactate, mmol/L, M (Q₁, Q₃) | 2.00 (1.30, 3.20) | 1.90 (1.30,2.94) | 1.70 (1.20,2.60) | 1.90 (1.20,3.20) | 2.60 (1.50,5.10) | <.001 |
| **Laboratory parameters** |  |  |  |  |  |  |
| WBC, x10⁹/L, M (Q₁, Q₃) | 13.20 (9.33, 18.00) | 12.80 (9.60,16.90) | 13.20 (9.40,17.30) | 13.30 (8.70,19.02) | 13.60 (9.67,19.50) | 0.220 |
| Platelets, x10⁹/L, M (Q₁, Q₃) | 204.00 (146.25, 266.00) | 197.00 (143.00,252.50) | 201.00 (144.00,263.50) | 203.00 (147.00,267.50) | 213.00 (153.75,282.00) | 0.013 |
| Albumin, g/dL, M (Q₁, Q₃) | 2.94 (2.70, 3.20) | 2.94 (2.80,3.20) | 2.94 (2.70,3.20) | 2.94 (2.60,3.20) | 2.94 (2.60,3.20) | 0.011 |
| Glucose, mg/dL, M (Q₁, Q₃) | 141.00 (114.00, 187.00) | 135.00 (112.00,174.00) | 141.00 (113.50,182.00) | 142.00 (115.00,187.00) | 148.50 (116.00,207.25) | 0.001 |
| ALT, IU/L, M (Q₁, Q₃) | 44.00 (20.00, 203.00) | 44.00 (20.00,203.00) | 38.00 (18.00,164.50) | 43.00 (21.00,201.25) | 53.00 (22.00,203.00) | 0.002 |
| AST, IU/L, M (Q₁, Q₃) | 61.00 (29.00, 290.00) | 60.00 (30.00,320.00) | 54.00 (26.00,181.50) | 58.00 (29.75,258.25) | 76.00 (31.00,320.00) | <.001 |
| Creatinine, mg/dL, M (Q₁, Q₃) | 1.10 (0.80, 1.70) | 1.00 (0.70,1.40) | 1.00 (0.70,1.50) | 1.20 (0.80,1.90) | 1.20 (0.80,2.00) | <.001 |
| **Scoring systems** |  |  |  |  |  |  |
| SOFA, M (Q₁, Q₃) | 7.00 (4.00, 10.00) | 5.00 (3.50,8.00) | 6.00 (4.00,9.00) | 8.00 (5.00,10.00) | 9.00 (6.00,11.00) | <.001 |
| APACHE III, M (Q₁, Q₃) | 49.00 (36.00, 68.00) | 43.00 (32.00,59.00) | 46.00 (34.50,60.00) | 53.00 (38.00,69.00) | 59.00 (44.00,82.00) | <.001 |
| SAPS II, M (Q₁, Q₃) | 40.00 (31.00, 52.00) | 37.00 (29.00,46.00) | 37.00 (29.00,47.00) | 41.00 (32.00,52.00) | 47.00 (36.00,58.00) | <.001 |
| **Comorbidity (n,%)** |  |  |  |  |  |  |
| Hypertension | 825 (36.60) | 209 (37.12) | 204 (37.02) | 218 (37.85) | 194 (34.40) | 0.643 |
| Diabetes Mellitus | 693 (30.75) | 181 (32.15) | 175 (31.76) | 184 (31.94) | 153 (27.13) | 0.200 |
| Heart Failure | 568 (25.20) | 131 (23.27) | 147 (26.68) | 128 (22.22) | 162 (28.72) | 0.042 |
| Myocardial Infarction | 313 (13.89) | 61 (10.83) | 81 (14.70) | 83 (14.41) | 88 (15.60) | 0.102 |
| Malignant Tumor | 224 (9.94) | 50 (8.88) | 51 (9.26) | 60 (10.42) | 63 (11.17) | 0.553 |
| CKD | 377 (16.73) | 96 (17.05) | 96 (17.42) | 102 (17.71) | 83 (14.72) | 0.518 |
| AKI | 2033 (90.20) | 507 (90.05) | 489 (88.75) | 514 (89.24) | 523 (92.73) | 0.111 |
| Pneumonia | 995 (44.14) | 218 (38.72) | 249 (45.19) | 253 (43.92) | 275 (48.76) | 0.008 |
| Stroke | 95 (4.21) | 24 (4.26) | 23 (4.17) | 34 (5.90) | 14 (2.48) | 0.041 |
| COPD | 375 (16.64) | 56 (9.95) | 84 (15.25) | 95 (16.49) | 140 (24.82) | <.001 |
| ICU dead, n (%) | 545 (24.18) | 86 (15.28) | 98 (17.79) | 138 (23.96) | 223 (39.54) | <.001 |
| Hospital day, M (Q₁, Q₃) | 13.08 (6.63, 24.28) | 13.43 (7.38,23.78) | 13.93 (7.44,25.71) | 14.72 (7.46,24.93) | 11.02 (4.17,21.69) | <.001 |
| ICU stay day, M (Q₁, Q₃) | 6.26 (2.99, 12.61) | 6.25 (2.93,12.21) | 6.70 (3.29,13.91) | 6.37 (3.17,12.55) | 5.61 (2.64,11.42) | 0.059 |
| Ventilation, n (%) | 2133 (94.63) | 535 (95.03) | 527 (95.64) | 545 (94.62) | 526 (93.26) | 0.338 |
| PETCO2, M (Q₁, Q₃) | 34.00 (30.00, 39.00) | 37.00 (33.00,42.00) | 36.00 (32.00,40.00) | 33.00 (29.00,38.00) | 29.00 (25.00,34.00) | <.001 |
| Quartile 1 to 4 represent four groups of patients stratified by the quartile values of VD/VT, with Quartile 1 being the lowest VD/VT group and Quartile 4 being the highest VD/VT group. Data presented as median (IQR) for continuous variables and n (%) for categorical variables. M: Median, Q₁: 1st Quartile, Q₃: 3st Quartile; MAP, mean artery pressure; RR, respiratory rate; WBC, white blood cell; ALT, alanine aminotransferase; AST, aspartate aminotransferase; CKD, chronic kidney disease; AKI, acute kidney injury; COPD, chronic obstructive pulmonary disease; PETCO2, end-tidal carbon dioxide pressure; VD/VT, dead space fraction. | | | | | | |

Table5. Demographic and Clinical Characteristics of Patients Stratified by the RCS-derived Threshold of VD/VT (0.222).

| Variables | Total  (n = 2254) | Low VD/VT group  (n = 1114) | High VD/VT group  (n = 1140) | *P* |
| --- | --- | --- | --- | --- |
|
| Age, M (Q₁, Q₃) | 63.00 (52.00, 71.00) | 62.00 (51.00, 71.00) | 64.00 (53.00, 71.00) | 0.122 |
| **Gender, n (%)** |  |  |  | 0.896 |
| Men | 1389 (61.62) | 688 (61.76) | 701 (61.49) |  |
| Female | 865 (38.38) | 426 (38.24) | 439 (38.51) |  |
| **Vital signs** |  |  |  |  |
| MAP, mmHg, M (Q₁, Q₃) | 79.00 (71.00, 84.00) | 79.00 (73.00, 85.00) | 79.00 (69.00, 82.00) | 0.004 |
| RR, bpm, M (Q₁, Q₃) | 20.00 (16.00, 24.00) | 19.00 (16.00, 23.00) | 20.00 (16.00, 25.00) | <.001 |
| SPO2, %, M (Q₁, Q₃) | 98.00 (95.00, 100.00) | 98.00 (95.00, 100.00) | 98.00 (94.00, 100.00) | 0.006 |
| **Arterial blood gas** |  |  |  |  |
| PH, M (Q₁, Q₃) | 7.32 (7.25, 7.39) | 7.36 (7.31, 7.41) | 7.28 (7.20, 7.34) | <.001 |
| PaCO2, mmHg, M (Q₁, Q₃) | 45.00 (39.00, 53.00) | 41.00 (36.00, 47.00) | 50.00 (43.00, 59.25) | <.001 |
| PaO2, mmHg, M (Q₁, Q₃) | 88.00 (51.00, 160.75) | 101.50 (63.00, 188.75) | 74.00 (45.00, 130.00) | <.001 |
| Lactate, mmol/L, M (Q₁, Q₃) | 2.00 (1.30, 3.20) | 1.80 (1.20, 2.80) | 2.30 (1.40, 4.00) | <.001 |
| **Laboratory parameters** |  |  |  |  |
| WBC, x10⁹/L, M (Q₁, Q₃) | 13.20 (9.33, 18.00) | 13.00 (9.50, 17.08) | 13.50 (9.17, 19.40) | 0.079 |
| Platelets, x10⁹/L, M (Q₁, Q₃) | 204.00 (146.25, 266.00) | 199.00 (143.00, 256.00) | 208.00 (148.00, 276.25) | 0.008 |
| Albumin, g/dL, M (Q₁, Q₃) | 2.94 (2.70, 3.20) | 2.94 (2.80, 3.20) | 2.94 (2.60, 3.20) | 0.010 |
| Glucose, mg/dL, M (Q₁, Q₃) | 141.00 (114.00, 187.00) | 138.50 (113.00, 177.00) | 144.00 (116.00, 197.00) | 0.003 |
| ALT, IU/L, M (Q₁, Q₃) | 44.00 (20.00, 203.00) | 41.00 (19.00, 203.00) | 47.00 (22.00, 203.00) | 0.004 |
| AST, IU/L, M (Q₁, Q₃) | 61.00 (29.00, 290.00) | 56.00 (28.00, 244.75) | 65.50 (30.00, 320.00) | 0.006 |
| Creatinine, mg/dL, M (Q₁, Q₃) | 1.10 (0.80, 1.70) | 1.00 (0.70, 1.50) | 1.20 (0.80, 2.00) | <.001 |
| **Scoring systems** |  |  |  |  |
| SOFA, M (Q₁, Q₃) | 7.00 (4.00, 10.00) | 6.00 (4.00, 9.00) | 8.00 (5.00, 11.00) | <.001 |
| APACHE III, M (Q₁, Q₃) | 49.00 (36.00, 68.00) | 44.00 (33.00, 60.00) | 56.00 (41.00, 77.00) | <.001 |
| SAPS II, M (Q₁, Q₃) | 40.00 (31.00, 52.00) | 37.00 (29.00, 46.00) | 43.00 (34.00, 55.00) | <.001 |
| **Comorbidity (n,%)** |  |  |  |  |
| Hypertension | 825 (36.60) | 413 (37.07) | 412 (36.14) | 0.646 |
| Diabetes Mellitus | 693 (30.75) | 356 (31.96) | 337 (29.56) | 0.218 |
| Heart Failure | 568 (25.20) | 278 (24.96) | 290 (25.44) | 0.792 |
| Myocardial Infarction | 313 (13.89) | 142 (12.75) | 171 (15.00) | 0.122 |
| Malignant Tumor | 224 (9.94) | 101 (9.07) | 123 (10.79) | 0.172 |
| CKD | 377 (16.73) | 192 (17.24) | 185 (16.23) | 0.522 |
| AKI | 2033 (90.20) | 996 (89.41) | 1037 (90.96) | 0.214 |
| Pneumonia | 995 (44.14) | 467 (41.92) | 528 (46.32) | 0.036 |
| Stroke | 95 (4.21) | 47 (4.22) | 48 (4.21) | 0.992 |
| COPD | 375 (16.64) | 140 (12.57) | 235 (20.61) | <.001 |
| ICU dead, n (%) | 545 (24.18) | 184 (16.52) | 361 (31.67) | <.001 |
| Hospital day, M (Q₁, Q₃) | 13.08 (6.63, 24.28) | 13.62 (7.39, 25.09) | 12.38 (5.81, 23.76) | 0.002 |
| ICU stay day, M (Q₁, Q₃) | 6.26 (2.99, 12.61) | 6.58 (3.03, 13.00) | 5.96 (2.93, 12.10) | 0.180 |
| Ventilation, n (%) | 2133 (94.63) | 1062 (95.33) | 1071 (93.95) | 0.145 |
| VD/VT, M (Q₁, Q₃) | 0.22 (0.11, 0.35) | 0.11 (0.06, 0.17) | 0.35 (0.28, 0.44) | <.001 |
| Patients were divided into two groups based on the RCS-derived threshold of VD/VT (0.222): the "Low VD/VT group" (VD/VT≤0.222) and the "High VD/VT group" (VD/VT>0.222). Data presented as median (IQR) for continuous variables and n (%) for categorical variables. M: Median, Q₁: 1st Quartile, Q₃: 3st Quartile; MAP, mean artery pressure; RR, respiratory rate; WBC, white blood cell; ALT, alanine aminotransferase; AST, aspartate aminotransferase; CKD, chronic kidney disease; AKI, acute kidney injury; COPD, chronic obstructive pulmonary disease; VD/VT, dead space fraction. | | | | |
